# Supplementary material for: Toxic Effects of Copper Fungicides on the Development and Behavior of Zebrafish in Early-Life Stages
Source: MDPI journal article supplement (doi:10.3390/nano13192629), 2023-09-23
Supplement: s1 [file s1]

## Supplementary material

Table S1. The 96 hpf mortality of zebrafish embryo exposed to PEG@Cu NCs, Kocide® 3000 and Cu(CH<sub>3</sub>COO)<sub>2</sub>.

| PEG@Cu NCs              |               | Kocide® 3000            |               | Cu(CH <sub>3</sub> COO) <sub>2</sub> |               |
|-------------------------|---------------|-------------------------|---------------|--------------------------------------|---------------|
| Concentration<br>(mg/L) | Mortality (%) | Concentration<br>(mg/L) | Mortality (%) | Concentration<br>(mg/L)              | Mortality (%) |
| Control                 | 0.00          | Control                 | 6.41          | Control                              | 6.98          |
| 0.0125                  | 2.22          | 0.25                    | 6.98          | 0.23                                 | 19.51         |
| 0.05                    | 31.11         | 0.5                     | 4.44          | 0.26                                 | 29.27         |
| 0.2                     | 53.33         | 1                       | 7.78          | 0.304                                | 65.85         |
| 0.8                     | 84.45         | 2                       | 6.67          | 0.349                                | 94.87         |
| 3.2                     | 93.33         | 4                       | 16.67         | 0.402                                | 100.00        |

Note: hpf = hours postfertilization.

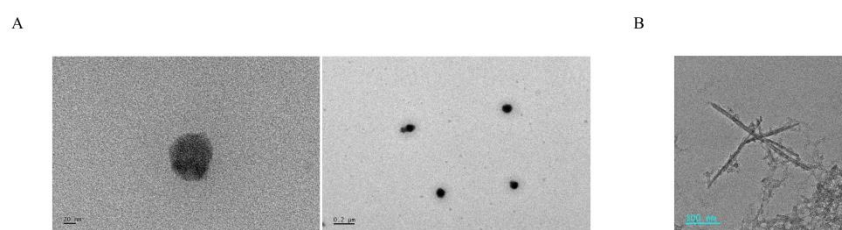

Figure S1. Transmission electron microscopy (TEM) images of PEG@Cu NCs (A) and Kocide® 3000 (B).

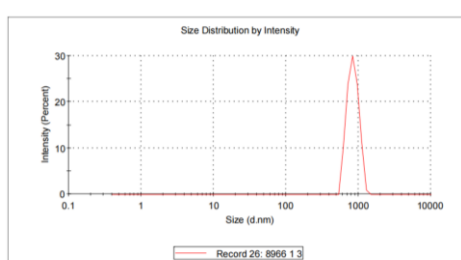

Figure S2. Hydrodynamic particle size distribution of Kocide® 3000.
